# Supplementary material for: Cmfhp Gene Mediates Fruiting Body Development and Carotenoid Production in Cordyceps militaris
Source: PubMed Central journal article supplement (PMC7175373; doi:10.3390/biom10030410), 2020-03-06
Supplement: biomolecules-10-00410-s001.pdf [file biomolecules-10-00410-s001.pdf]

# *Cmfhp* Gene Mediates Fruiting Body Development and Carotenoid Production in *Cordyceps militaris*

Hai-Wei Lou <sup>1,2</sup>, Yu Zhao <sup>2</sup>, Bai-Xiong Chen <sup>1</sup>, Ying-Hao Yu <sup>1</sup>, Hong-Biao Tang <sup>1</sup>, Zhi-Wei Ye <sup>1</sup>, Jun-Fang Lin <sup>1,3,\*</sup> and Li-Qiong Guo <sup>1,3,\*</sup>

<sup>1</sup> Department of Bioengineering, College of Food Science, South China Agricultural University, Guangzhou 510640, China

<sup>2</sup> College of Food Science and Technology, Henan University of Technology, Zhengzhou 450001

<sup>3</sup> Research Center for Micro-Ecological Agent Engineering and Technology of Guangdong Province, Guangzhou 510640, China

\* Correspondence: linjf@scau.edu.cn (J.-F.L.); guolq@scau.edu.cn (L.-Q.G.)

**Table S1.** Oligonucleotide primer sequences used in this study.

| Primer Name    | Primer Sequence (5' to 3')       | Amplification purpose                                                                                                         |
|----------------|----------------------------------|-------------------------------------------------------------------------------------------------------------------------------|
| KOfhpU-F       | GGATCCGCGCGTGTCAATGCTGAC         | Primers for amplifying the 5' split-marker fragment (2292 bp)                                                                 |
| KOfhpU-R       | CCGATGACAGCGACCACGCTCTTG         |                                                                                                                               |
| KOfhpD-F       | CCACTACATCGAGACAAGCACGGTCAACTTC  | Primers for amplifying the 3' split-marker fragment (2801 bp)                                                                 |
| KOfhpD-R       | CGGTGCTTCTCCTATGGGCTTTGATACCATTG |                                                                                                                               |
| Bar-F          | GCTCGAAGTGTGACTCTTATTAGCAGAC     | Primers for amplifying an 890 bp fragment of the <i>bar</i> cassette                                                          |
| Bar-R          | GCTTGGACAAATGAACGTATCTTATCGAG    |                                                                                                                               |
| JCfhp-F        | CGAGACCATACGCGCATCTTCTAC         | Primers for amplifying an 1196 bp fragment of the <i>Cmfhp</i> gene                                                           |
| JCfhp-R        | GCTCGAGGTGAATCTTGTCTCCTCGTT      |                                                                                                                               |
| JCfhpU-F       | GTCGGAGATGCTCTATTCTTATCCACATCT   | Primers used to verify the replacement of the upstream end of the <i>Cmfhp</i> gene                                           |
| JCfhpU-R       | CGTTCCTGTCTGCTAATAAAGAGTCACAC    |                                                                                                                               |
| JCfhpD-F       | CCTACAGGACACACATTCATCGTAGGTAT    | Primers used to verify the replacement of the downstream end of the <i>Cmfhp</i> gene                                         |
| JCfhpD-R       | GCTGTTAGTTCTGATACCTCTCACAACCTCT  |                                                                                                                               |
| probe-F        | TGCACCATCGTCAACCACTACATC         | Primers for amplifying a 433 bp fragment of the <i>bar</i> gene. The 433 bp fragment was used to prepare the <i>bar</i> probe |
| probe-R        | GCTGCCAGAAACCCACGTCAT            |                                                                                                                               |
| <i>tefl</i> -F | GTCAAGGAAATCCGTCGTGGTAA          | Primers for detecting the <i>tefl</i> gene expression                                                                         |
| <i>tefl</i> -R | GCAGGCGATGTGAGCAGTGTG            |                                                                                                                               |
| Qfhp-F         | CCTTTGCTATCCATGCTCGAC            | Primers for detecting the <i>Cmfhp</i> gene expression                                                                        |
| Qfhp-R         | CGACGTTGCTAAGGAAGACC             |                                                                                                                               |
| CmfhpC-F       | GCCTCAACACGACGTACACGGTGTG        | Primers for amplifying the entire <i>Cmfhp</i> gene                                                                           |
| CmfhpC-R       | GCAACGAACACACCAAACGGTTCTTCGTAT   |                                                                                                                               |
| JCBen-F        | GGTGCTGCTTCTGTTACGTCGTCAT        | Primers for amplifying a 754 bp fragment of the <i>ben</i> gene                                                               |
| JCBen-R        | GTCTCGTCGGAGTTCTCAACGAGCTGAT     |                                                                                                                               |

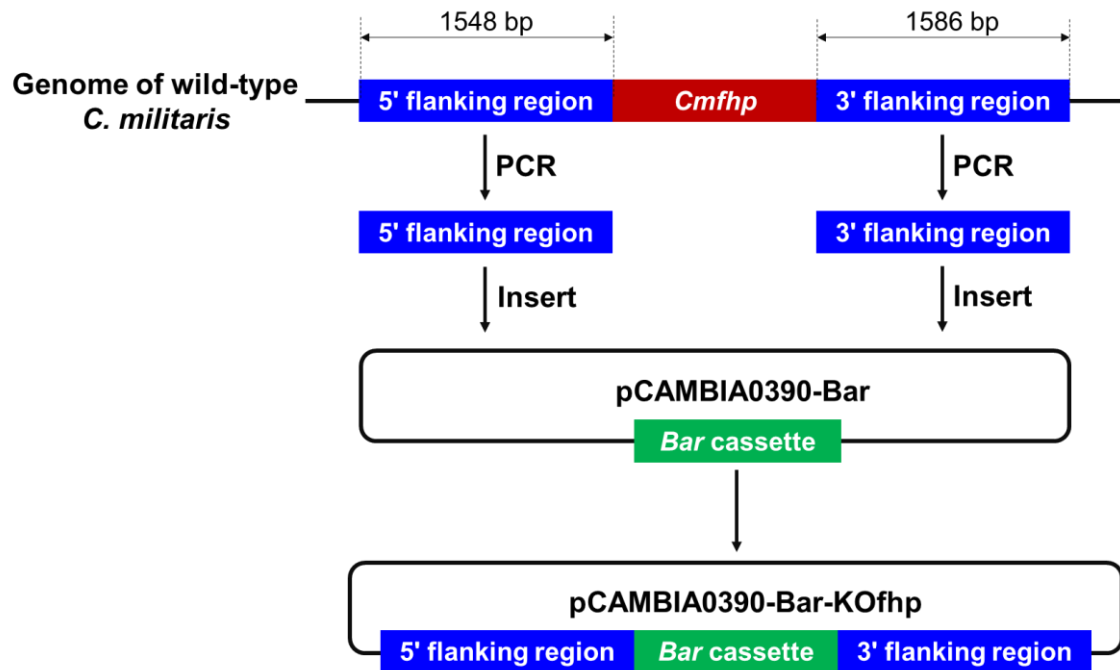

**Figure S1.** Construction of the vector pCAMBIA0390-Bar-KOfhp. The *bar* cassette contains a phosphinothricin acetyltransferase gene (*bar*) under the control of *Aspergillus nidulans trpC* promoter and *trpC* terminator.

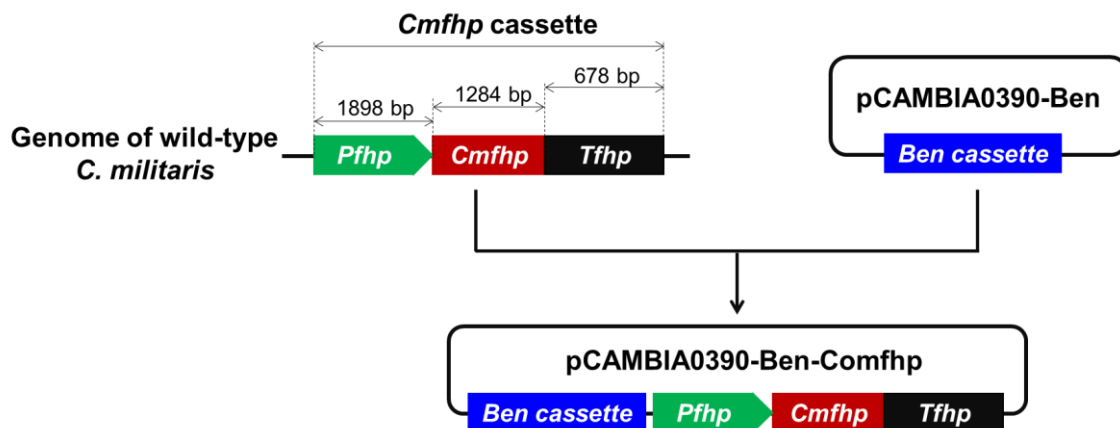

**Figure S2.** Construction of the vector pCAMBIA0390-Ben-Comfhp. *P fhp*, promoter of the *Cm fhp* gene; *T fhp*, terminator of the *Cm fhp* gene. The *ben* cassette contains the benomyl resistant gene (*ben*), the promoter *P ben*, and the terminator *T ben*.

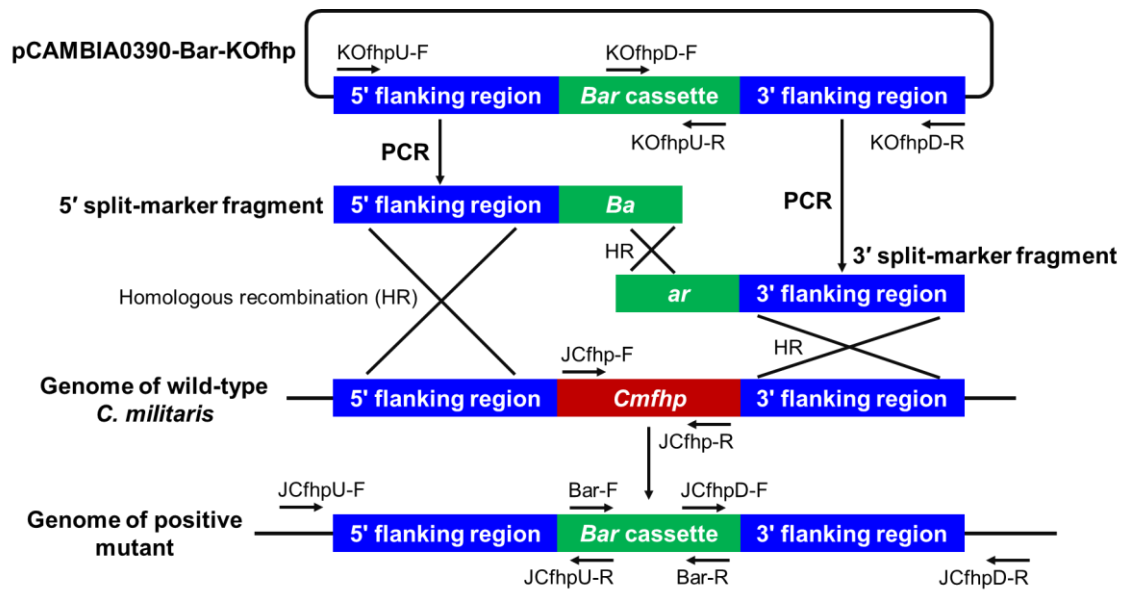

Figure S3. Schematic diagram for preparing split-marker fragments and deletion of the *Cmfp* gene.
